# Supplementary figures and images for: CD44v6 Defines a New Population of Circulating Tumor Cells Not Expressing EpCAM
Source: MDPI journal article supplement (doi:10.3390/cancers13194966), 2021-10-02

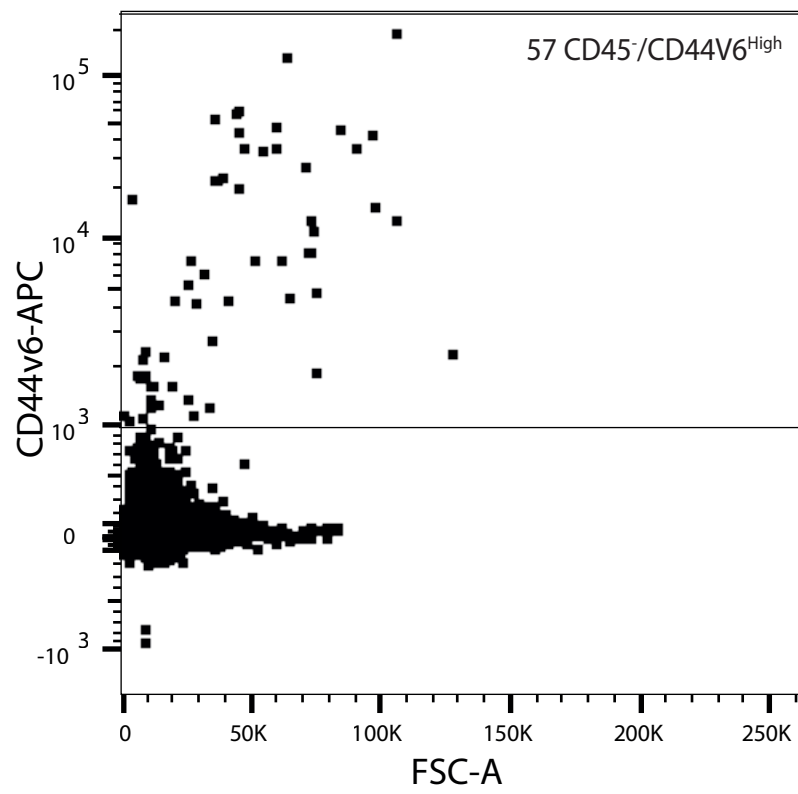

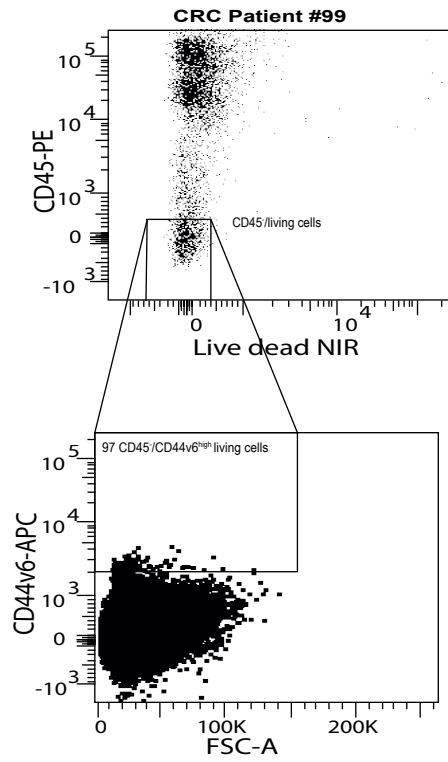

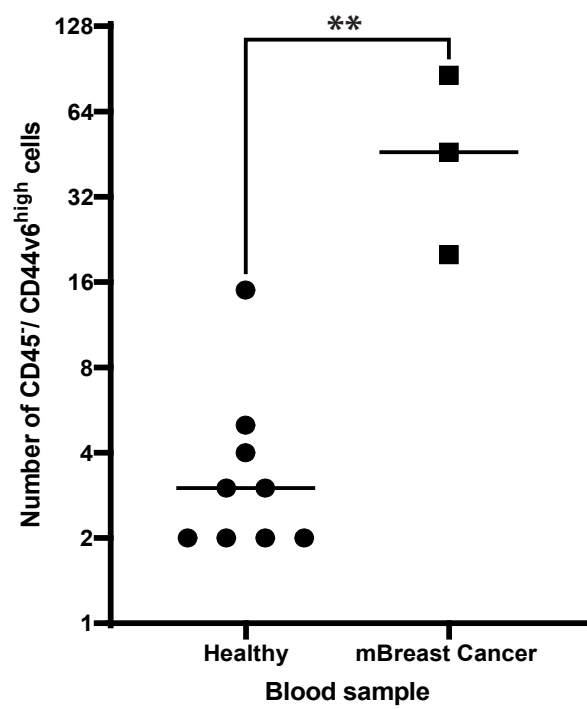

Supplement: s1 [file s1]
